## **Importin $\alpha$ 2 association with chromatin: Direct DNA binding via a novel DNA binding domain**

**Kazuya Jibiki<sup>1</sup>, Takashi S. Kodama<sup>2, 5</sup>, Atsushi Suenaga<sup>1,3</sup>, Yota Kawase<sup>1</sup>, Noriko Shibazaki<sup>3</sup>, Shin Nomoto<sup>1</sup>, Seiya Nagasawa<sup>3</sup>, Misaki Nagashima<sup>3</sup>, Shieri Shimodan<sup>3</sup>, Renan Kikuchi<sup>3</sup>, Mina Okayasu<sup>3</sup>, Ruka Takashita<sup>3</sup>, Rashid Mehmood<sup>4</sup>, Noriko Saitoh<sup>5</sup>, Yoshihiro Yoneda<sup>6</sup>, Ken-ich Akagi<sup>6, 7</sup>, Noriko Yasuhara<sup>1, 3\*</sup>**

1 Graduate School of Integrated Basic Sciences, Nihon University, Setagaya-ku, Tokyo, Japan

2 Laboratory of Molecular Biophysics, Institute for Protein Research, Osaka University, Osaka, Japan

3 Department of Biosciences, College of Humanities and Sciences, Nihon University, Setagaya-ku, Tokyo, Japan

4 Department of Life Sciences, College of Science and General Studies, Alfaisal University, Riyadh, KSA.

5 Division of Cancer Biology, The Cancer Institute of JFCR, Tokyo, Japan

6 National Institutes of Biomedical Innovation, Health and Nutrition (NIBIOHN), Osaka, Japan

7 present address: Environmental Metabolic Analysis Research Team, RIKEN Center for Sustainable Resource Science, Yokohama, Kanagawa, Japan

\* Corresponding author. E-mail: yasuhara@chs.nihon-u.ac.jp

## Abstract

Nuclear transport of proteins is important for facilitating appropriate nuclear functions. The proteins of the importin  $\alpha$  family play key roles in nuclear transport as transport receptors for a huge number of nuclear proteins. Additionally, these proteins possess other functions, including chromatin association and gene regulation. However, these non-transport functions of importin  $\alpha$  are not yet fully understood, especially their molecular-level mechanisms for functioning with chromatin and their consequences. Here, we report the novel molecular characteristics of importin  $\alpha$  involving binding to diverse sequences in chromatin. We newly identified and characterized a DNA-binding domain—the Nucleic Acid Associating Trolley pole domain (NAAT domain) in the N-terminal region of importin  $\alpha$  within the conventional importin  $\beta$  binding (IBB) domain, which was shown to be necessary for nuclear transport of cargo proteins. We propose a ‘stroll around and locate’ model to explain the association of importin  $\alpha$  with chromatin. This is the first study to delineate the interaction between importin  $\alpha$  and chromatin DNA via the NAAT domain, indicating the bifunctionality of the importin  $\alpha$  N-terminal region for nuclear transport and chromatin association.

## Introduction

The importin  $\alpha$  family is a class of nuclear transport receptors that mediate protein translocation into the eukaryotic cell nucleus through the nuclear pore (1). Proteins are generally synthesised in the cytoplasm, so nuclear proteins, such as transcription factors, have to be transported into the nucleus via transport receptors such as importins. Importin  $\alpha$  receptors recognise their cargo proteins by their nuclear localisation signal (NLS) (2-3). Importin  $\alpha$  carries out the nuclear import process by forming a trimeric complex with importin  $\beta$ 1 and the cargo protein (4-5). The binding of Ran-GTP to importin  $\beta$ 1 dissociates importin  $\beta$ 1 from the importin  $\alpha$ -cargo protein complex (6), while the binding of Nup50 or CAS to importin  $\alpha$  facilitates the dissociation of importin  $\alpha$  from its cargo (6-8).

Architecturally, importin  $\alpha$  family proteins consist of three domains: 1) the N-terminal importin  $\beta$ -binding (IBB) domain, which interacts with importin  $\beta$ 1 or otherwise binds in an autoregulatory fashion to two NLS-binding sites of importin  $\alpha$  itself (9-10); 2) a main body with a helix repeat domain called armadillo (ARM) repeats, which includes two NLS-binding sites; and 3) the C-terminal region, which includes the Nup50 and the CAS binding domain necessary for NLS release and importin  $\alpha$  nuclear export for recycling.

Importin  $\alpha$  family proteins are expressed from several gene families in mammalian cells, and these families possess distinct cargo specificities. Their expression profiles vary widely depending on the cell types, and the protein activities in the nucleus are regulated through selective nuclear protein transport (11-13). In this study, we designate the importin  $\alpha$  family proteins as importin  $\alpha$ 1 (KPNA1, NPI1, importin  $\alpha$ 5 in humans), importin  $\alpha$ 2 (KPNA2, Rch1, and importin  $\alpha$ 1 in humans),

importin  $\alpha$ 3 (KPNA3, Qip2, and importin  $\alpha$ 4 in humans), importin  $\alpha$ 4 (KPNA4, Qip1, and importin  $\alpha$ 3 in humans), importin  $\alpha$ 6 (KPNA6, NPI2, and importin  $\alpha$ 7 in humans), and importin  $\alpha$ 8 (KPNA7).

Importin  $\alpha$  proteins have been shown to perform other functions in addition to their NLS transport receptor function for selective nuclear transport. These additional non-canonical functions include spindle assembly, lamin polymerisation, nuclear envelope formation, protein degradation, cytoplasmic retention, gene expression, cell surface function, and mRNA-related functions (11). In addition, importin  $\alpha$  family members are also known to accumulate in the nucleus under certain stress conditions, such as heat shock and oxidative stress, wherein they bind to a DNase-sensitive nuclear component (14-16). Thus, for a deeper and more comprehensive understanding of the roles of importin  $\alpha$  proteins in cellular events, an overall view of their canonical and non-canonical functions and a thorough understanding of the underlying molecular mechanisms of each function are important.

Among these non-canonical functions, the association of importin  $\alpha$  proteins, especially importin  $\alpha$ 2, with chromatin was the focus of this study. In the present study, we attempted to investigate the molecular mechanisms underlying this chromatin association of importin  $\alpha$  and revealed that importin  $\alpha$  proteins directly bind to multiple regions in genomic DNA through a novel chromatin-associating domain in the IBB domain. We also found that the association of importin  $\alpha$ 2 with DNA was multi-modal, electrostatic, of intermediate strength, and semi-specific. These characteristics of the association allowed importin  $\alpha$  to move around the DNA and facilitate efficient delivery of proteins to their target sites and recruit proteins through a facilitated diffusion mechanism, i.e. a 'stroll around and locate' model. This is the first study to reveal that importin  $\alpha$  is a DNA-binding protein with a novel DNA-binding domain essential for the non-canonical role of the IBB domain.

## **Materials and methods**

### **Cell culture**

Mouse ES cell lines were cultured as follows. The Bruce-4 cell line was maintained in DMEM supplemented with 15% FCS and ESGRO (Merck Millipore, UK) on a 0.1% gelatine-coated dish at 10% CO<sub>2</sub>. Culture images are shown in Supplementary Figure S1A.

### **Immunostaining**

For immunostaining, cells were seeded on 0.1% gelatine-coated cover glass slips and then fixed in 3.7% formalin (Nacalai Tesque Inc., Japan., Japan.) in PBS. Cells were permeabilized using 0.5% Triton X100 (Nacalai Tesque Inc., Japan.) in PBS and blocked with 3% skim milk (Nacalai Tesque

Inc., Japan.) in PBS. The first antibody for KPNA2 (importin  $\alpha$ 2) (rat monoclonal antibody, MBL, Japan: 1/400 dilution; or goat polyclonal, Santa Cruz: 1/200 dilution) and the second antibody (Alexa488 conjugated anti-rat or anti-rabbit IgG in 1/100 dilution; Thermo Fisher Scientific, US) were suspended in Can get signal solution (Toyobo, Japan). DNA was stained with DAPI (Nacalai Tesque Inc., Japan.), and images were obtained by confocal microscopy A1 with NIS-Elements software (Nikon, Japan) with 600 $\times$  magnification.

### Plasmid construction

The full-length and mutant pEGFP constructs of importin  $\alpha$  were first cloned as previously described (17). pEGFP-importin  $\alpha$ 2 NAAT mutants 28A4, 39A5, and 49A3 were constructed (unpublished) using the KOD-plus-Mutagenesis Kit (Toyobo, Japan).

The primers used were as follows:

NAAT-28A4 Fwd-GCTGCTATAGAAGTTAATGTGGAAGCTCAGGAAA

NAAT-28A4 Rev-AGCAGCCATTTCTGTGCTGTCCTTCCC

NAAT-39A5 Fwd-AGCGGCAGCGAGTTCCACATTAAC

NAAT-39A5 Rev-GCTGCCGATGAGCAGATGCTG

NAAT-49A3 Fwd-AACGTCAGCTCCTTTCCTGATGAT

NAAT-49A3 Rev-AGCAGCAGCCAGCATCTGCTCATCTT

The GST-importin  $\alpha$ 2 NAAT mutants 28A4, 39A5, and 49A were generated by inserting the *Bam*HI–*Eco*RI PCR fragments amplified from pEGFP plasmids into the *Bam*HI–*Eco*RI sites of the *Escherichia coli* N-terminal GST-fused protein expression vector pGEX-6P-2 (GE Healthcare, US). Recombinant proteins were obtained as described in Supplementary Methods 1. The plasmids for GST-importin  $\alpha$ 1 (18), GST-importin  $\alpha$ 2 (4), and GST-importin  $\alpha$ 3 (19) were obtained as previously described.

The fragments from the upstream regulatory region (LOC108961160 on chromosome 17, NCBI Reference Sequence: NG\_051978.1) of mouse POU5F1 (MGI:101893, NCBI Gene: 18999) were obtained as follows. The target fragments were obtained from Bruce-4 cell genome DNA with the following targeting primers:

EcoRV upstream-1: Fwd-TACGATATCCACATCTGTTTCAAGCTAGTTCTA

EcoRV upstream-1-1: Rev-TACGATATCTGAATCTTCCGTTTCCTCC

EcoRV upstream-2: Fwd-TACGATATCGAGAATTATCAGGAGTTCAAGG

EcoRV upstream-2-1: Rev-TACGATATCACTTCCTGCTCCCCA

The obtained fragments were inserted into pBlueScript vector, followed by PCR using the primer sets

upstream-1 Fwd/upstream-1-2 Rev and upstream-2 Fwd/upstream-2-2 Rev,

upstream-1-2 Rev- TGAATCTTCCGTTTCCTCCA

upstream-2-2 Rev- ACTTCCTGCTCCCCAACC

### **Genomic DNA shearing**

Bruce-4 cells at 60%-70% confluence on 0.1% gelatine-coated 10-cm culture dishes were lysed in ChIP Elution Buffer (50 mM Tris-HCl pH 8.0, 10 mM EDTA, 1% SDS), and were sonicated six times for 5 s at an output level of 4 with Handy Sonic (TOMY, Japan), followed by seven cycles of 30 s on and 60 s off at the high level with Bioruptor II (BM Equipment, Japan). The cell lysates were then incubated for 3.75 h with 250 mM NaCl and 0.25 mg/mL Proteinase K (Nacalai Tesque Inc., Japan.). The sheared genomic DNA was purified using the FastGene Gel/PCR Extraction Kit (Nippon Genetics Co., Ltd., Japan) and fractionated by electrophoresis in 2% agarose gel. The fraction containing 600-bp genomic DNA was cut from the agarose gel (cutting images shown in Supplementary Figure S1) and underwent DNA purification using the FastGene Gel/PCR Extraction Kit (Nippon Genetics Co., Ltd., Japan).

### **Gel-shift assay**

The interaction of the importin  $\alpha 2$  protein and duplex DNA was analysed by the gel-shift assay. The probes were 600-bp duplex DNA fragments (upstream-1, upstream-2, and genomic DNA) with biotinylated 3' ends. DNA biotinylation at the 3' end was performed using the Biotin 3' End DNA Labeling Kit (Thermo Fisher Scientific, US) in accordance with the manufacturer's instructions with some modifications. For this step, 0.236-pmol duplex DNA fragments were biotinylated with terminal deoxynucleotidyl transferase (TdT) in 50  $\mu$ L of a labelling reaction mixture (1X TdT Reaction Buffer, 0.5  $\mu$ M Biotin-11-UTP, 0.15 U/ $\mu$ L TdT) at 37°C for 30 min, which was followed by termination by addition of 2.5  $\mu$ L 0.2 M EDTA and TdT removal from the labelling reaction mixture by chloroform extraction. The biotinylated DNA fragments were applied to the gel-shift assay by using the LightShift Chemiluminescent EMSA Kit (Thermo Fisher Scientific, US) and Chemiluminescent Nucleic Acid Detection Module (Thermo Fisher Scientific, US) according to the manufacturer's instructions. In this step, 17.24 pmol or 34.48 pmol of importin  $\alpha 2$  recombinant proteins and 0.33  $\mu$ L of the labelling reaction mixture containing biotinylated duplex DNA fragments were mixed to allow binding in a 20- $\mu$ L binding reaction mixture (1X Binding Buffer, 50 ng/ $\mu$ L, Poly (dl-dC), 2.5% glycerol, 0.05% NP-40, 5 mM MgCl<sub>2</sub>). Then, the binding reaction mixture was subjected to electrophoresis at a 200-V constant pressure current in 4% TBE polyacrylamide gel. The DNA fragments in the gel were transferred to the nylon membrane and were combined with Streptavidin-Horseradish Peroxidase Conjugate. The Streptavidin-Horseradish Peroxidase Conjugate was detected using Pxi4 (Syngene, UK) or G:BOX mini (Syngene, UK). All assays were tested three times in independent experiments (See also Supplementary Methods and

Figures).

### **Chromatin immunoprecipitation**

Chromatin immunoprecipitation assays were performed as previously described (20) with some modifications. A culture of  $1.0 \times 10^7$  ES cells were crosslinked in 0.5% formaldehyde containing media for 5 minutes at room temperature followed by termination of the reaction with 0.125 M glycine. Cell pellets were then suspended in RIPA buffer (50 mM Tris-HCl [pH 8.0], 150 mM NaCl, 2 mM EDTA, 1% NP-40, 0.5% sodium deoxycholate, and protease inhibitor cocktail) and were sheared for seven cycles of 30 s on and 60 s off at the high level with Bioruptor II (BM Equipment, Japan). The cell lysates were then diluted to a DNA concentration of 100 ng/ $\mu$ L after centrifugation at  $15000 \times g$  for 10 minutes and were applied to IP using specific antibodies. In the next step, 25  $\mu$ L of the cell lysate for each sample was used as inputs. The antibodies were anti-KPNA2 (importin  $\alpha$ 2) (rabbit polyclonal, Abcam, UK) or normal rabbit IgG (EMD Millipore Corp) as a control (1  $\mu$ g added to 250  $\mu$ L of cell lysate solution), and 20  $\mu$ L of Dynabeads M-280 (Thermo Fisher Scientific, US) were used. The IP solutions were incubated at 4°C overnight with rotation, and the beads were washed with ChIP buffer (10 mM Tris-HCl pH 8.0, 200 mM KCl, 1 mM CaCl<sub>2</sub>, 0.5% NP-40, and protease inhibitor cocktail), wash buffer (10 mM Tris-HCl pH 8.0, 500 mM KCl, 1 mM CaCl<sub>2</sub>, 0.5% NP-40, and protease inhibitor cocktail) and TE buffer. Reverse crosslinking was achieved by mixing the beads with 50  $\mu$ L of ChIP Elution Buffer (50 mM Tris-HCl pH 8.0, 10 mM EDTA, 1% SDS), and the input lysate was applied similarly after adding 25  $\mu$ L of ChIP Elution Buffer followed by incubation with 2% proteinase K (Nacalai Tesque Inc., Japan.) at 50°C for 1h. Obtained DNA was purified using the Wizard SV Gel and PCR Clean up system (Promega, US) in a final volume of 50  $\mu$ L. See also Supplementary Methods 2.

### **Quantitative PCR**

Quantitative PCR assays after ChIP were performed using THUNDERBIRD SYBR qPCR Mix (TOYOBO, Japan) and the Thermal Cycler Dice Real Time System II (TAKARA BIO, Japan) according to the manufacturer's protocols with the primers below. In brief, two of the 50- $\mu$ L eluted solutions obtained in ChIP were used for each reaction with 0.6  $\mu$ L of 10  $\mu$ M primer solution and 10  $\mu$ L of THUNDERBIRD SYBR qPCR Mix with nuclease-free water (Nacalai Tesque Inc., Japan.) up to 20  $\mu$ L in total. Reaction cycles were as follows; 95°C for 30 s, 95°C for 15 s/54°C for 15 s/60°C for 30 s (70 cycles), 95°C for 15 s/60°C for 30s, 95°C for 15s (single cycle to obtain the dissociation curve). The standard curves for either primer sets were obtained using the genomic DNA purified from input lysates with four dilution rates, x0, x0.1, x0.01, x0.001, for individual samples. Three copies of one ChIP sample were made for every reaction, and the mean value of relative quantity of the importin  $\alpha$ 2 ChIP sample or control samples using normal rabbit IgG were

calculated from the standard curve. All values for the relative quantity in importin  $\alpha 2$  ChIP samples were within the range of the standard curves obtained. Then, the relative ratio was calculated as (importin  $\alpha 2$  ChIP)/(ChIP control). Four independent experiments were performed.

The target sequences were upstream of the mouse gene POU5F1 (MGI: 101893, NCBI Gene: 18999, LOC108961160 on chromosome 17, NCBI Reference Sequence: NG\_051978.1.)

upstream-1: Fwd-CACATCTGTTTCAAGCTAGTTCTAAGAA

upstream-1-2: Rev-CAACCTTGCTTATGGATTGTTCTCTT

upstream-2: Fwd-ATGAAGACTACCATCAAGAGACACC

upstream-2-2: Rev-TTGTCTGTCTGCTCCTACACCAT

### **Homology modelling of N-terminal domain of importin $\alpha 2$ protein**

Homology modelling of the importin  $\alpha 2$  IBB domain was performed using the Swiss Model with default parameters. Amino acid sequences of the IBB domain of mouse importin  $\alpha 2$  were applied as target sequence, and PDB ID: 1QGK was selected as the template.

### **Circular dichroism (CD) spectroscopy**

Far-ultraviolet CD spectra from 300 nm to 195 nm were collected on a Jasco J-820 spectropolarimeter at room temperature with 50 mM importin  $\alpha$  peptide in 20 mM phosphate buffer at pH 7.0 by using a 0.05-cm path-length fused silica cuvette. A band path of 1-nm and the corresponding scan speed were selected. Sixty-four scans were averaged, and the blank spectrum was subtracted from the sample spectra to calculate ellipticity.

### **NMR measurement**

NMR spectra were acquired on a Bruker Avance II 800 MHz spectrometer equipped with a cryogenically cooled proton optimised triple resonance NMR 'inverse' probe (TXI) (Bruker Biospin, Germany). All spectra were acquired at 25°C (298 K) with 256 scans using the p3919gp pulse program. Acquisition and spectrum processing were performed using Topspin3.2TM software. Chemically synthesised peptide and DNAs were dissolved in 50 mM Tris-Cl buffer solution containing 10% D<sub>2</sub>O, pH 7.9 and used for the measurements in 4-mm $\phi$  Shigemi tubes. The amino acid sequence of the chemically synthesised peptide was KDSTEMRRRRISNVELRKAKKDEQMLKRR (importin  $\alpha$  2<sub>21-50</sub>), and the 15-bp DNA sequences were GCA GAT GCA TAA CCG (SOX-POU) and GCG GAC CAC TAG ACG (randomised control sequence).

## **Results**

### **1. Importin $\alpha 2$ interacts with the genomic DNA of ES cells**

Among importin  $\alpha$  family proteins, importin  $\alpha 2$  is highly and predominantly expressed in mouse ES cells and is involved in important physiological functions. To evaluate the chromatin-related functions of importin  $\alpha 2$ , we first assessed the nuclear distribution of importin  $\alpha 2$  in mouse ES cells. Endogenous importin  $\alpha 2$  was localised both in the cytoplasm and the nucleus (Figure 1A), as shown by immunostaining assays using two different antibodies. Widespread nuclear staining of importin  $\alpha 2$  was observed. A similar staining pattern has been reported in HeLa cells, in which the distribution of nuclear importin  $\alpha 2$  diminished with DNase treatment (17). If the nuclear distribution could be attributed to direct interaction with DNA, the widespread staining indicates that importin  $\alpha 2$  has the ability to directly bind to a relatively wide range of DNA sequences. Thus, we tested whether and to what extent importin  $\alpha 2$  binds to genomic DNA to assess the possibility of a direct interaction with chromatin DNA. We prepared mixtures of genomic DNA fragments with sizes of approximately 600 bp by digestion of chromatin from undifferentiated ES cells and assayed whether importin  $\alpha 2$  binds to these DNA mixtures by performing electrophoretic mobility gel-shift assays (Figure 1B, also see Supplementary Figure S1B, C). In the gel-shift assays, despite its low isoelectric point at 5.49, importin  $\alpha$  caused apparent shifts of the DNA band in a dose-dependent manner. The results clearly indicated that importin  $\alpha 2$  has affinity for diverse sequences of genomic DNA because not only parts of the mixture but the overall fractions of 600-bp fragments were also shifted by the addition of wild-type importin  $\alpha 2$ .

Next, to determine whether importin  $\alpha 2$  binds genomic DNA *in vivo*, we performed chromatin immunoprecipitation quantitative PCR (ChIP-qPCR) analyses using undifferentiated ES cells. Since the accessibility to DNA is affected by the structure of chromatin, which depends on the cell stages, we chose two target sequences whose activities are expected to be different in undifferentiated ES cells. We termed the two 200-bp DNA sequences of mouse POU5F1 (Oct3/4 gene) upstream regions as 'upstream-1' and 'upstream-2', where upstream-1 included the conserved distal enhancer CR4 domain and upstream-2 included the proximal enhancer domain. These two enhancers differentially contributed to stage-specific Oct3/4 expression during embryogenesis (21). The distal enhancer is known to be essential and sufficient for Oct3/4 expression in ES cells while the proximal enhancer is rather necessary for epiblasts (22). Primer sets to amplify the first 200 bp of each upstream region were used in importin  $\alpha 2$  ChIP-qPCR (Figure 1C). The results showed that both upstream-1 and upstream-2 were stably detected after positive PCR amplification from importin  $\alpha 2$  ChIP samples (Figure 1D and S1D-G). Taken together, these results suggested that multiple DNA sequences, including the POU5F1 genomic region, potentially interact with importin  $\alpha 2$ . Therefore, we further adopted these regions to identify the binding domain of importin  $\alpha 2$  to DNA.

## **2. Importin $\alpha 2$ directly binds the DNA via the IBB domain**

To clarify the mechanism of importin  $\alpha 2$  binding to DNA, we decided to determine the molecular



binding mode *in vitro* by using model fragments of ES cell genome DNA. First, we checked whether the importin  $\alpha 2$  protein directly binds to DNA by performing gel-shift assays using the recombinant importin  $\alpha 2$  protein and the double-stranded DNAs obtained from the mouse ES cell genome (Figure 2 and S2). The two upstream 600-bp DNA sequences of the POU5F1 gene tested in qPCR assays (Figure 1C) were used in this assay. The wild-type importin  $\alpha 2$  interacted with both upstream DNA fragments of the POU5F1 gene, confirming that the DNA fragment from this region effectively bound importin  $\alpha 2$  *in vitro*.

Next, we determined the DNA-binding region of importin  $\alpha 2$  by conducting additional gel-shift assays using recombinant importin  $\alpha 2$  mutant proteins lacking functional domains. We focused on three major parts including the functional domains of importin  $\alpha 2$ : (1) the IBB domain with a linker, (a.a. 1-69); (2) the main body (a.a. 70-392); and (3) the C-terminal region (a.a. 393-529) (Figure 2A and S2A). The recombinant mutant proteins containing the IBB domain showed affinity for both upstream-1 and upstream-2 600-bp DNA sequences of the POU5F1 gene, whereas the  $\Delta$ IBB domain mutant (a.a. 70-529) did not show any significant shift compared to the native DNA band (Figure 2B, C, and S2B-E). Here, the IBB domain that has been characterized as a coordinator of nuclear transport and autoinhibition was also necessary for DNA binding of importin  $\alpha 2$  *in vitro*. The velocity of migration in electrophoresis under a spatially uniform electric field reflects both the hydrodynamic particle size and the net charge. Although the IBB domain of importin  $\alpha$  itself is positively charged (the isoelectric point is 10.61), the main body of importin  $\alpha$ , especially its C-terminal portion, bears a high negative charge, and the isoelectric point of full-length importin  $\alpha$  is 5.49. Consequently, the reduction of migration (shift) upon binding of full-length importin  $\alpha$  to DNA sequences is attenuated because the negative net charge of importin  $\alpha$  partly offset the reduction of the migration. On the other hand, the deletion mutant 1-329 lacking the highly negatively charged C-terminal portion has an isoelectric point of 8.80, and this mutant can be expected to show relatively large reduction of migration (large shift) due to its high positive net charge.

### **3. Basic amino acid clusters within the IBB domain contribute to the binding of importin $\alpha 2$ to DNA**

To elucidate the portion of the IBB domain responsible for DNA binding, we also examined whether any sequence homology to known nucleic acid-binding proteins was present in the IBB domain sequence of importin  $\alpha$ . A protein BLAST search against the protein and nucleic acid structure database (Protein Data Bank) revealed that only the importin IBB domain families showed significant homology to the whole region of the IBB domain of importin  $\alpha 2$  (data not shown). However, a BLAST search under search parameters adjusted for short input sequences detected many short motifs in the database. DNA-binding and RNA-binding proteins were then extracted from the hit sequences, and these analyses revealed that 24,830 of the 156,365 PDB entries shared

short fragments that showed significant homology to importin  $\alpha_2$  (KDSTEMRRRRISNVELRKAKKDEQMLKRR) (see Supplementary Methods 3 for detailed procedures). Surprisingly, importin  $\alpha_2$ , which had never been classified as a nucleic acid-binding protein, showed homology with a large number of nucleic acid-binding proteins, even though the matched sequences were only on short length scales. These matching sequences included 675 entries for complexes of DNA and protein and 799 entries for complexes of RNA and protein. These entries accounted for approximately 13% of all the DNA-protein complexes (5071 entries) in the PDB and about 38% of all RNA-protein complexes (2104 entries), respectively. These hits included 27 DNA-protein complexes containing a tetra-R motif which is also found in the IBB domain (Supplementary Table S1-1) and 36 RNA-protein complexes containing the motif (Supplementary Table S1-2). Thus, astonishingly, the importin  $\alpha$  IBB domain, a well-known canonical domain for nuclear transport regulation, was found to possess short basic motifs similar to those in nucleic acid-binding proteins. Furthermore, a clear diversity was found in the interaction pattern of the tetra-R motif with the nucleic acids, in the protein secondary structures of the region containing the motif, and in the target nucleic acid structures and sequences (Supplementary Table S1). The manner in which the tetra-R motif directly comes into contact with DNA was roughly divided into three types of interactions: 1) as a part of the  $\alpha$ -helix that binds deeply to the major grooves of DNA; 2) as a part of the extended strand that binds to the minor grooves; and 3) as a part of the  $\alpha$ -helix riding on nucleic acid phosphate backbones. Considering these results together, the tetra-R motif appeared to be a useful element in interactions with nucleic acids. On the basis of these results and the known affinity of basic amino acids to DNA (23), we hypothesised that importin  $\alpha_2$  might have interacted with DNA via the basic amino acid-rich portion within the IBB domain. Then, we aligned the importin  $\alpha$  family IBB domain to check for conservation of the basic amino acids in the IBB domain (Figure 2D and E). While some variations in amino acid sequences were seen, four clusters of basic amino acids, including the tetra-R motif, were essentially conserved among the importin  $\alpha$  family proteins.

Thus, we focused on the three prominent basic amino acid clusters, 28RRRR, 39RKAKK, and 49RRR, of the IBB domain and designed amino acid substitution mutants to clarify the importin  $\alpha_2$  DNA-binding domain. The R and K residues within each cluster were substituted to A, as shown in Figure 3A (see also Figure S3A), to create the mutants 28A4, 39A5, and 49A3, respectively. The R- and K-to-A substituted recombinant mutant proteins were used in gel-shift analyses to test the binding affinity against the same POU5F1 gene DNA sequences. The shift was significantly abolished by the mutations, with the effect of the 28A4 mutation being especially salient (Figure 3B, C, and S3B-E). Furthermore, we examined the binding ability of the mutant to genomic DNA mixtures (Figure 3D, S3F-G), and the mutants (28A4, 39A5 and 49A3) showed only a weak or no interaction.

#### 4. Importin $\alpha$ -DNA association model

We next attempted to determine how importin  $\alpha 2$  binds to DNA. The amino acids 14L-16F and 24S-51R of the IBB domain adopt an  $\alpha$ -helical conformation in the crystal structure of the complex with importin  $\beta 1$  (PDB ID: 1QGK) (Figure 3A and E). In contrast to the crystal structures of the complex with importin  $\beta 1$ , the IBB domain of importin  $\alpha$  has been reported as a missing part in many crystal structures (for example, PDB ID: 5TBK; 5HUU; 5HUY; 5V5P; 5V5O; 5W4E). This suggests that the IBB domain adapts multi-conformational states or disordered conformation when it is not bound to importin  $\beta 1$ . Therefore, we predicted the intrinsic propensity of the IBB domain for three-dimensional structure formation by analysing the amino acid sequence through the web server SCRATCH, which is based on machine learning methods (24). This analysis revealed that the central part 24S-51R of the IBB domain tends to easily form an  $\alpha$ -helix structure, at least after being induced by other molecules (Figure 3F). Accordingly, the results of CD measurements of the importin  $\alpha 2_{1-69}$  peptide showed that the importin  $\alpha 2_{1-69}$  peptide has an intrinsic helix-rich structure (estimated helix content, approximately 33.7%), and the addition of double-stranded DNA (upstream-1, 600 bp) slightly increased the helix content to 40.5% (Figure 3G, H and S4). These values corresponded to that of the secondary structure predicted by SCRATCH, suggesting that the basic amino acid clusters within the IBB domain interact with DNA in an  $\alpha$ -helical conformation as is in the crystal structure with importin  $\beta 1$  (9).

We next investigated the binding pattern of the IBB domain to DNA by docking and MD simulations using the  $\alpha$ -helical structure of IBB in the complex with importin  $\beta 1$  (PDB ID: 1QGK). To predict the binding features of importin  $\alpha 2$  and DNA, we constructed a model structure of the IBB domain  $\alpha$ -helix-DNA complex using AutoDock vina (25) and analysed the  $\alpha$ -helix-DNA interaction at the atomic level by performing a 30-ns MD simulation of the docked model structure to optimise the structures (see Supplementary Methods 4 and Discussion for the computational experiment). The energetic and conformational analyses of the MD trajectory revealed two  $\alpha$ -helix/DNA-binding modes (mode A and B) (Figure 4A-D and Figure S5). The  $\alpha$ -helix in the IBB domain was fitted into a major groove of the canonical B-form DNA strands for mode A (Figure 4A and C), while it was placed on DNA in parallel for mode B (Figure 4B and D). In mode B, the peptide interacts with the phosphate backbone of the DNA at four points simultaneously, which is possible because the basic amino acids on the helix are concentrated on one side (Figure S6, and Supplementary Methods 5). These binding modes correspond to the two binding types for  $\alpha$ -helical states out of the three tetra-R motif binding types mentioned in the BLAST search results in section 3. The electrostatic interactions between the negatively charged phosphate groups in DNA and the positively charged patches (28RRRR, 39RKAKK, and 49KRR) on the surface of the  $\alpha$ -helix were important in both modes, and the  $\alpha$ -helix did not directly read specific bases in the DNA.

Interestingly, the  $\alpha$ -helix moved on the DNA from state A to B during our short-term simulation.

We assessed the validity of our model structures (modes A and B) by introducing mutations (mutations 28A4, 39A5, and 49A3) in the positive electrostatic patches on the  $\alpha$ -helix surface for both A and B mode structures and repeating the experiment. The calculated binding free energies indicated weakening of the binding affinities for these variants, reflecting the disappearance of a part of the positive electrostatic patch on the  $\alpha$ -helix surface (Table 1).

Furthermore, to elucidate the binding strength and stoichiometry of importin  $\alpha$  to DNA, we performed one-dimensional NMR titration experiments of chemically synthesised 15-bp double-stranded DNA (GCA GAT GCA TAA CCG), which is the core sequence of the SOX-POU binding region in the upstream-1 region, including the POU5F1 distal enhancer, with chemically synthesised peptides (importin  $\alpha$ <sub>2</sub>-21-50, the core part of the basic amino acid-rich region in mouse importin  $\alpha$ ) (Figure 4E, F, S7 and Table S2). The chemical shift changes in the imino proton region with the addition of peptide are shown in Figure 4E. We also examined the interaction between importin  $\alpha$ <sub>2</sub>-21-50 and a randomised sequence DNA duplex (GCG GAC CAC TAG ACG), which has the same length as the SOX-POU core sequence (Figure 4F). In the NMR titration experiments, several peaks in the DNA imino proton region of 1D spectra were apparently perturbed by the addition of the peptide in both experiments (see Supplementary Methods 6 for the detail). The observed spectral changes obviously showed two phases in each titration experiment, indicating that the binding of the peptide to DNA had at least two modes (Figure 4E-H and Figure S7, Table S2). Therefore, the spectral changes of the typical peaks in the entire imino proton region were analysed by non-linear least-square fitting to obtain the dissociation constants and stoichiometries for the binding by assuming two-step multivalent binding.

The estimated binding strengths were  $K_{d1} = 3 \times 10^{-7}$  and  $K_{d2} = 6 \times 10^{-4}$  with respect to the SOX-POU sequence, and the stoichiometries were 1:2 (DNA:peptide) for the first strong binding mode and 1:3 for the relatively weak binding mode. For the randomised sequence DNA duplex, the estimated apparent binding strengths were  $K_{d1} = K_{d2} = 1 \times 10^{-4}$ , and the change was saturated at a stoichiometry of 1:4 (DNA:peptide). The changes in the chemical shifts without remarkable broadening of resonance line widths (Figure 4E-H) indicate that binding interactions occur in the fast exchange regime on the NMR chemical shift timescale, which in turn suggests that the binding dissociation constant  $K_d$  would have to fall in the  $10^{-6}$  M range or more (weaker) (26). This held true for both modes of binding to randomised sequences, suggesting that the binding was almost diffusion-limited, whereas one of the estimated dissociation constants for SOX-POU was out of this range. This implies that the on-rate for binding to SOX-POU was significantly facilitated and that each microscopic step of the binding event had a short half-life, despite the relatively strong overall binding. Since multivalent binding with a relatively weak binding strength on each site resulted in an apparent intermediate-strength binding, the binding features can be listed as follows: the binding is

multivalent; both on-rate and off-rate are high; the apparent overall binding affinity is intermediate; and the binding is semi-specific for the DNA sequence (with some extent of sequence preference).

As described in Figure 3A and 3E, the importin  $\alpha$  IBB domain contains conserved basic amino acid sites around the N-terminal short helix (14L-16R in importin  $\alpha 2$ ), 28RRRR, 39RKAKK, and 49RRR, and the sites touched DNA either in modes A or B in the MD simulation (Figure 4A-D). Here, we designated the DNA-binding domain of importin  $\alpha$ , with the four conserved basic sites in the IBB domain (13R-51R of mouse importin  $\alpha 2$ ), as the “Nucleic Acid Associating Trolley pole” (NAAT) domain. Note that the NAAT domain does not include the NLS-binding sites nor is it located close to these sites; therefore, importin  $\alpha$  should be capable of binding DNA and cargo simultaneously.

### **5. DNA-binding features appear to be conserved among importin $\alpha$ family proteins**

The helix positions of the basic amino acids within the NAAT domain are fundamentally conserved among the importin  $\alpha$  families (Figure 2D, E, and S6). Considering the fact that the basic amino acid clusters responsible for DNA binding of importin  $\alpha 2$  are conserved, the DNA-binding feature via the NAAT domain seemed to be conserved among importin  $\alpha$  family proteins.

In addition to basic amino acid conservation, one additional acidic amino acid is found in importin  $\alpha 3$ , 4, and two acidic residues were found in importin  $\alpha 1,6$  with respect to  $\alpha 2,8$  in the positively charged side of the helix. Thus, the importin  $\alpha$  families can be characterized by the relative arrangement of the conserved basic amino acids, and these acidic amino acids were divided into three groups (Figure S6). Unexpectedly, this grouping is consistent with the traditionally recognised classification of importin  $\alpha$ s based on whole-length sequence similarity and their functions (11, 13). The coincident classification indicates that this grouping may reflect a relationship between the evolution of the canonical and non-canonical functions of importin  $\alpha$  via the NAAT revealed in this study.

Such considerations prompted us to evaluate whether the DNA-binding property is commonly conserved in the importin  $\alpha$  family, and we used other importin  $\alpha$  family proteins in the gel-shift assay with the same genomic DNA fragments as those used in the assays for importin  $\alpha 2$ . Actually, we used importin  $\alpha 1$  and  $\alpha 3$  as representatives of the subtypes. Both importin  $\alpha 1$  and importin  $\alpha 3$  shifted the whole fraction of the 600-bp sheared genomic DNA with minor differences in effectiveness (Figure 5, S8). Importin  $\alpha 3$  bound with similar efficiency as importin  $\alpha 2$ , while importin  $\alpha 1$  showed slightly reduced efficiency. These results clearly showed that importin  $\alpha$  family proteins share DNA-binding characteristics. The results of the amino acid sequence analysis and the gel-shift assay indicate that the DNA-binding property is commonly conserved among importin  $\alpha$  family proteins. However, the findings also suggest that there may be some differences in the DNA-binding property within the family as well. Detailed analyses of the differences is an

interesting topic for future studies from the view of integrated functions of importin  $\alpha$  family proteins for chromatin.

## Discussion

The findings of this study suggest that importin  $\alpha$  proteins can be revisited as DNA-associating proteins with unique characteristics. A novel DNA-binding NAAT domain was identified as a series of helix structures in the N-terminal IBB domain of importin  $\alpha 2$  (Figure 6A). The basic amino acids arranged along the helix as positively charged patches on the surface enable multi-mode binding of importin  $\alpha 2$  to a broad range of genomic DNA molecules in a semi-specific manner, and this property is probably conserved among all importin  $\alpha$  families.

The DNA-binding NAAT domain is distinct from the conventional DNA-binding domains of known DNA-binding proteins, although there are some common traits between NAAT and these proteins. For example, although the existence of positively charged amino acid clusters is a typical characteristic of DNA-binding proteins, as shown in our BLAST search, the semi-sequence-specific binding mode based on electrostatic interactions using basic amino acid clusters and the estimated tertiary structure of the NAAT complex are different from the known DNA-binding proteins. Most of the known sequence-specific protein-DNA associations are based on a system-specific fine balancing act of diverse competing forces and generally involve negligible to highly unfavourable net electrostatics, a highly favourable van der Waals interaction, and hydrophobic interactions, where the unfavourable net electrostatics for binding arise from the acidic and neutral residues despite the favourable contribution of the basic residues on the protein (27). Moreover, although NLS is mapped on the DNA-binding domains of many DNA-binding cargo proteins (28) and IBB/NAAT can also bind the NLS-binding site of importin  $\alpha$  itself in an autoinhibitory manner (29), the NLS is generally placed out of the DNA-binding interface in the cargo proteins; in other words, the basic amino acid residues in the NLS of the cargos are independent of DNA-binding residues, but NAAT can bind to both DNA and the NLS-binding site using exactly the same residues. All these characteristics must be recognised as distinct structural traits in different lineages.

Our results show two distinct properties of the association between importin  $\alpha$  and DNA (chromatin): first, importin  $\alpha$  can interact with the vast majority of genomic sequences, and second, it simultaneously shows moderate sequence selectivity with preference for some specific sites. Consequently, the characteristics of the DNA-binding ability of importin  $\alpha$  via the NAAT domain satisfy the necessary conditions for efficient delivery of itself and/or cargos to various sites of chromatin based on the framework of a dimension-reduced facilitated diffusion model for searching promoters of DNA-binding proteins on chromatin (30, 31). This physicochemical model describes that a certain DNA-binding protein randomly binds to multiple sites on the DNA and diffuses by sliding, jumping, or hopping along the DNA chain until it reaches its specific functional sites. This

reduction in the dimensionality (3D to 1D) of the search space for the target enhances the search efficiency under certain conditions, and, in fact, some DNA-binding proteins have been known to be able to locate their target sites amid myriad off-target sequences within millions to billions of base pairs at remarkably rapid rates (32) that are sometimes two orders of magnitude larger than the value estimated from three-dimensional diffusion (33). Various theoretical and experimental studies have been conducted in order to characterize the mechanisms underlying this rapid target site search (34-44). Facilitated diffusion is one of the predominant models used to characterize this phenomenon (34). Although the concept of facilitated diffusion is a topic of debate (39, 42), the model has an increasing body of supporting evidence (42).

This mechanism necessarily requires the DNA-binding proteins to show semi-specific binding properties that are fundamentally non-selective but with some sequence preference for the target site (45,46), and the balance of these behaviours seems to determine the efficiency of the target search (42). It is also considered to be preferable that a protein (or a protein complex) has at least two DNA-binding surfaces or more to perform an intersegmental transfer from a DNA site to another site (39). These properties were exactly shown in the exchange of binding modes demonstrated or implied by MD simulation, biochemical mutant works, and NMR measurements for NAAT domain binding to DNA. Theoretical considerations also suggest that electrostatic interaction may play an important role in this facilitated diffusion (32, 39). For the facilitated diffusion of nearby off-target DNA sequences, a large positively charged patch on a protein surface is essential (32), and the sliding rate is influenced by the degree of positive charge clustering in the specific binding region of the nucleic acid-binding protein (47). Thus, the properties of the NAAT domain meet the requirements for facilitated diffusion, considering the four positively charged patches covering over a half of the entire surface (Figure S6), and the fact that the results of the NMR titration experiments suggested that the process consists of relatively accelerated association and rapid dissociation as is described in section 4. In combination with the fact that the NAAT domain interacted with a wide range of sequences shown in the present study, the association of importin  $\alpha$  with chromatin is suggested to follow the principle of facilitated diffusion. Regarding the binding specificity in the facilitated diffusion process, there is a trade-off between the search step efficiency and the recognition step, which usually exhibits relatively strong and specific binding (32). The results of NMR titration experiments apparently showed a sequence-dependent preference for the binding in addition to the non-sequence-specific binding ability. In addition, while transferring cargos including other DNA-binding proteins, the sequence specificity of importin  $\alpha$  binding to DNA could be augmented by the cargos. Thus, these findings and the supporting evidence indicate that the binding properties of NAAT to DNA can facilitate both searching and recognising the target on the huge sequence space on chromatin, either directly or indirectly through facilitated diffusion, semi-specific association, and/or cooperative target recognition with cargos. Here, we propose the



‘stroll around and locate’ model for the association of chromatin with importin  $\alpha$ , in which importin  $\alpha$  is continuously moving around DNA to rapidly search over a wide range of genome regions and arrive at the destination (Figure 6B).

The multifunctionality of the IBB domain may also be important in this context. The non-canonical DNA-binding NAAT domain was identified in the canonical IBB domain required for nuclear transport of NLS proteins in an overlapping manner. For the canonical IBB domain, reports have described many intracellular functions of importin  $\alpha$  by virtue of its binding to various proteins. For example, the interactions of the IBB domain with various proteins such as Nup50 (8), RAN (48), and RBBP4 (49) are known to be involved in the nuclear transport complex disassembly process, and the interaction with CAS (6, 50) is known to be involved in the export step since the IBB domain plays an important role for stabilization of the importin  $\alpha$ /Cse1p (CAS)/RanGTP ternary complex (51,52). Furthermore, studies have investigated the relationship between the transport activities and formation of the autoinhibitory form in which IBB binds to the NLS-binding site of importin  $\alpha$  itself, where the basic amino acids in IBB play a critical role (8-10). The functional amino acids involved in the interactions with the IBB/NAAT binding partners, including its autoinhibitory conformation, are summarized in Figure S9 (also see Supplementary Method 7). Since these binding sites partly overlap or line up closely, this overlapping may cause interference between the binding partners to some extent. However, importin  $\alpha$  is likely to avoid such interference *in vivo* because of the distinct localisation of each binding partner in minute fractions in the nucleus. Furthermore, the NAAT-DNA interaction is predominantly electrostatic and seems to be different from the protein-protein interactions between IBB and other transport factors such as CAS and importin  $\beta$ . For example, IBB-importin  $\beta$  recognition occurs through a spatial arrangement of highly conserved acidic and hydrophobic residues (53), so the priority of the binding partner will be sensitively affected by the local microenvironment within the cell nucleus, such as the surrounding ion content, ion concentrations, and crowders, because changes in these conditions differently affect each type of interaction.

The destination of each component of the transport complex was shown to be stochastic after assembly and disassembly at nuclear pores, and the segregation was not strict in the cell nucleus (51). Even if the segregation of the binding partners is insufficient, the overlapping of the binding sites on the IBB will enable an enhanced sharp switching by reinforcement of the recombination of the complex, reflecting the differences in the concentration of the binding partners in each microcompartment and the differences in microenvironment as discussed above, and the final spatial regulatory mechanism may also be linked to structural regulation of chromatin.

The switching may be directly related to the successful cycling of importin  $\alpha$  translocation from the cytoplasm to the nucleus, from the nucleoplasm to the DNA, and back from the nucleus to the cytoplasm. This switching feature may also explain previously reported data in which the nuclear



transport function of importin  $\alpha$  was altered by enhancement of nuclear accumulation-associated DNase-sensitive contents under stress conditions such as heat shock or oxidative stress (16), and which was used to suggest that dysfunction of importin  $\alpha$  as a transport receptor was the dominant determinant of NLS transport suppression (54). Furthermore, the previous studies proposed that a mutual control mechanism exists in which the normal protein transport pathway is suppressed for the urgent transport pathways that facilitate the specific import of heat shock proteins (16,17) such as Hsp70 via Hikeshi (55). Thus, the overlap of canonical and non-canonical binding sites in the same domain, NAAT/IBB, seems to be a molecular basis for the functional coupling of suppression of nuclear transport and the nuclear retention in the stress response of cells.

Notably, the relationship between importin  $\alpha$  chromatin association and transcriptional regulation is an important aspect to further understand the role of importin  $\alpha$ -chromatin interaction. Importin  $\alpha$  is known to carry various cargos, (13) including Oct3/4 (56-59), which binds to the cis element SOX-POU. The present study used ChIP-qPCR assays to demonstrate that importin  $\alpha$  actually bound to the upstream sequence of the POU5F1 gene, and the NMR titration experiment showed that importin  $\alpha$  bound to the SOX-POU element with greater binding preference than that for random-sequence DNA. These results imply that importin  $\alpha$  not only carried transcriptional regulators in a non-sequence-specific manner, but also interacted directly with the target DNA sequences in a semi-specific manner probably to support the cargo protein binding. Interestingly, nuclear retention of importin  $\alpha$  has been reported to coordinate HeLa cell fate through changes in STK35 gene expression (17). Moreover, a transcription factor Zac1 was shown to require importin  $\alpha$  not only for the nuclear import but also for expression of the target gene p21 (60). In both studies, ChIP-qPCR assays found that the promoter regions of the targets, STK35 or p21, coprecipitated with importin  $\alpha$ . Additionally, importin  $\alpha$  forms complexes with the yeast transcriptional activator GAL4 and the GAL4 target DNA, independent of GAL4 nuclear transport (61). At least for these factors, it is worth investigating whether importin  $\alpha$  is involved in their control via NAAT. From the perspective of cargo, the fates will be regulated by binding competitions and/or by cooperation among several factors, including IBB/NAAT, in the process of nuclear transport (see Supplementary Figure S10 for the cargo fate determination steps in detail). For example, TRIM28 is reported to possess importin  $\alpha$ -dependent NLS which overlaps with the HP1 binding box, suggesting that the preferential interaction of TRIM28 to HP1 associated with heterochromatin occurs after the importin  $\alpha$ -dependent nuclear transport (62). In combination with our results, this process may occur in a cooperative manner with NAAT to DNA binding and TRIM28 to HP1 binding.

In studies using *dim-3* (defective in methylation -3) mutants of *Neurospora crassa* in which importin  $\alpha$  showed an E396K mutation, importin  $\alpha$  was reported to be essential for heterochromatin formation and DNA methylation by targeting cargo proteins to chromatin (63,64). Interestingly, *dim-3* mutation decreased the interactions between constitutive heterochromatic domains. Since this

amino acid is required for IBB autoinhibitory binding to importin  $\alpha$  itself, the E396K mutation in *Neurospora* may influence the behaviour of IBB/NAAT and alter the interaction of importin  $\alpha$  and chromatin. Another intriguing topic is the tethering of importin  $\alpha$  to the membrane by palmitoylation during mitosis, which controls the balance of the importin  $\alpha/\beta$  complex and thereby scales the mitotic spindle (65). The expanded perspective suggests that NAAT will play a role in the mitotic chromatin behaviour by sequestering importin  $\alpha$ .

Phase separation of chromatin-related factors in a variety of contexts has been recently shown to be effective in controlling chromatin structure and functions (66). Among a large number of importin  $\alpha$ -dependent cargos, there are hundreds of cargos that are related to transcription, chromatin organization, RNA processing, and nucleic acid metabolic processes (67). In the homology search for the IBB domain in this study, we identified many proteins in RNA-protein complexes possessing similar basic amino acid cluster as in NAAT (Supplementary Table S1-2). Thus, the NAAT/IBB domain may bind not only to DNA but to RNA as well. Considering this information with the other findings, the binding of the importin  $\alpha$  NAAT domain to chromatin may partly affect the structural changes and/or phase separation of chromatin coupled with cargo proteins such as chromatin remodelling factors. Therefore, clarification of the relationship between NAAT and this nuclear sub-compartmentalization via phase separation is an important topic for future research.

The findings obtained in this study suggest that importin  $\alpha$  plays pivotal roles in a wide range of delicate regulatory processes with subtlety in each step of nuclear events as a coordinator for delivering chromatin-binding proteins to their targets (S22). Although each step of this sequence should be reckoned with in detail in future, the use of NAAT peptides itself as a competitor should be a great advantage in further studies of physiological significance and drug discovery, considering the situation that more than 60 peptide drugs have already been approved for therapeutic use, and several hundreds of novel therapeutic peptides are under preclinical and clinical development (68).

Since all members of the importin  $\alpha$  family seem to possess an NAAT domain and have slightly different amino acid sequences, variations in the physiological effects of importin  $\alpha$  chromatin association via NAAT domain are also of considerable interest. The expression patterns of importin  $\alpha$  family members show marked differences in different cell types, which indicates their roles in cell fate determination. For example, regulation of development and alterations in the expression profiles of different importin  $\alpha$  subtypes during differentiation in ES cells and during spermatogenesis (reviewed in 69-71), etc. have been studied so far. Furthermore, different importin  $\alpha$  proteins have different cargo specificities. Therefore, the interwoven variations in these factors could enable rigorous regulations. Conversely, the interactions between importin  $\alpha$  and chromatin may also be modified by the presence of cargo proteins such as transcriptional regulatory factors, and these modifications may be responsible for the regulation of cellular physiological functions. If the

chromatin association is influenced by its cargos, the composite effects of the variation of importin  $\alpha$  types and of the cargos may be related to general transcriptional regulation and the variety of physiological functions.

In summary, we propose the ‘stroll around and locate’ model to explain the association between importin  $\alpha$  and chromatin via the NAAT domain after entering the nucleus (Figure 6B), and we suggest that this model may be related to a wide variety of cellular physiological processes.

### **Funding**

This work was supported by the Japan Society for the Promotion of Science (JSPS) KAKENHI to Noriko Yasuhara (18H04870, 15K07069, 25116008) and Noriko Saitoh (18H05531, 18K19310) and by a Nihon University Multidisciplinary Research Grant for 2018.

### **Acknowledgments**

We thank Drs. Naoki Horikoshi, Saki Hirata, Yuichiro Semba, S.J. Nogami, Hiroyuki Taguchi, Hitoshi Kurumizaka, Yasuyuki Ohkawa and Hiroshi Kimura for kind suggestions and discussions about this work. The construct for GST-importin  $\alpha 2$  mutant (1-329) were kindly gifted from Dr. Yoshinari Yasuda.

### **Author contributions**

Experiments were conducted as follows. Cell imaging: KJ, NS, RT, NS, NY. ChIP-qPCR: SS, RK, NY. Mutant construction and analysis: KJ, SN, YK, MO, SS, NS, NY. Homology modeling and Bioinformatics analysis: TK, KJ, NY. MD analysis: AS, MN. Circular Dichroism measurement and analysis: TK. NMR measurement and analysis: TK, KA. Conceptual input and supervision: KJ, TK, AS, NS, YY, RM, NY. Project design and writing: KJ, TK, AS, NY.

### **Reference**

1. Goldfarb, D.S., Corbett, A.H., Mason, D.A., Harreman, M.T. and Adam, S.A. (2004) Importin alpha: a multipurpose nuclear-transport receptor. *Trends Cell Biol*, **14**, 505-514.
2. Kalderon, D., Richardson, W.D., Markham, A.F. and Smith, A.E. (1984) Sequence requirements for nuclear location of simian virus 40 large-T antigen. *Nature*, **311**, 33-38.
3. Lange, A., Mills, R.E., Lange, C.J., Stewart, M., Devine, S.E. and Corbett, A.H. (2007) Classical nuclear localization signals: definition, function, and interaction with importin alpha. *J Biol Chem*, **282**, 5101-5105.
4. Imamoto, N., Shimamoto, T., Takao, T., Tachibana, T., Kose, S., Matsubae, M., Sekimoto, T., Shimonishi, Y. and Yoneda, Y. (1995) In vivo evidence for involvement of a 58 kDa

- component of nuclear pore-targeting complex in nuclear protein import. *EMBO J*, **14**, 3617-3626.
5. Görlich, D. and Mattaj, I.W. (1996) Nucleocytoplasmic transport. *Science*, **271**, 1513-1518.
  6. Kutay, U., Bischoff, F.R., Kostka, S., Kraft, R. and Görlich, D. (1997) Export of importin alpha from the nucleus is mediated by a specific nuclear transport factor. *Cell*, **90**, 1061-1071.
  7. Lindsay, M.E., Plafker, K., Smith, A.E., Clurman, B.E. and Macara, I.G. (2002) Npap60/Nup50 is a tri-stable switch that stimulates importin-alpha:beta-mediated nuclear protein import. *Cell*, **110**, 349-360.
  8. Matsuura, Y. and Stewart, M. (2005) Nup50/Npap60 function in nuclear protein import complex disassembly and importin recycling. *EMBO J*, **24**, 3681-3689.
  9. Kobe, B. (1999) Autoinhibition by an internal nuclear localization signal revealed by the crystal structure of mammalian importin alpha. *Nat Struct Biol*, **6**, 388-397.
  10. Lott, K. and Cingolani, G. (2011) The importin  $\beta$  binding domain as a master regulator of nucleocytoplasmic transport. *Biochim Biophys Acta*, **1813**, 1578-1592.
  11. Miyamoto, Y., Yamada, K. and Yoneda, Y. (2016) Importin  $\alpha$ : a key molecule in nuclear transport and non-transport functions. *J Biochem*, **160**, 69-75.
  12. Pumroy, R.A. and Cingolani, G. (2015) Diversification of importin- $\alpha$  isoforms in cellular trafficking and disease states. *Biochem J*, **466**, 13-28.
  13. Oka, M. and Y. Yoneda (2018). Importin  $\alpha$ : functions as a nuclear transport factor and beyond. *Proc Jpn Acad Ser B Phys Biol Sci*. **94**(7): 259–274.
  14. Kодиha, M., Chu, A., Matusiewicz, N. and Stochaj, U. (2004) Multiple mechanisms promote the inhibition of classical nuclear import upon exposure to severe oxidative stress. *Cell Death Differ*, **11**, 862-874.
  15. Furuta, M., Kose, S., Koike, M., Shimi, T., Hiraoka, Y., Yoneda, Y., Haraguchi, T. and Imamoto, N. (2004) Heat-shock induced nuclear retention and recycling inhibition of importin alpha. *Genes Cells*, **9**, 429-441.
  16. Miyamoto, Y., Saiwaki, T., Yamashita, J., Yasuda, Y., Kotera, I., Shibata, S., Shigeta, M., Hiraoka, Y., Haraguchi, T. and Yoneda, Y. (2004) Cellular stresses induce the nuclear accumulation of importin alpha and cause a conventional nuclear import block. *J Cell Biol*, **165**, 617-623.
  17. Yasuda, Y., Miyamoto, Y., Yamashiro, T., Asally, M., Masui, A., Wong, C., Loveland, K.L. and Yoneda, Y. (2012) Nuclear retention of importin  $\alpha$  coordinates cell fate through changes in gene expression. *EMBO J*, **31**, 83-94.

18. Sekimoto, T., Imamoto, N., Nakajima, K., Hirano, T. and Yoneda, Y. (1997) Extracellular signal-dependent nuclear import of Stat1 is mediated by nuclear pore-targeting complex formation with NPI-1, but not Rch1. *EMBO J*, **16**, 7067-7077.
19. Kimoto, C., Moriyama, T., Tsujii, A., Igarashi, Y., Obuse, C., Miyamoto, Y., Oka, M. and Yoneda, Y. (2015) Functional characterization of importin  $\alpha 8$  as a classical nuclear localization signal receptor. *Biochim Biophys Acta*, **1853**, 2676-2683.
20. Semba, Y., Harada, A., Maehara, K., Oki, S., Meno, C., Ueda, J., Yamagata, K., Suzuki, A., Onimaru, M., Nogami, J. *et al.* (2017) Chd2 regulates chromatin for proper gene expression toward differentiation in mouse embryonic stem cells. *Nucleic Acids Res*, **45**, 8758-8772.
21. Choi, H.W., Joo, J.Y., Hong, Y.J., Kim, J.S., Song, H., Lee, J.W., Wu, G., Schöler, H.R. and Do, J.T. (2016) Distinct Enhancer Activity of Oct4 in Naive and Primed Mouse Pluripotency. *Stem Cell Reports*, **7**, 911-926
22. Liao, J., He, Y. and Szabó, P.E. (2013) The Pou5f1 distal enhancer is sufficient to drive Pou5f1 promoter-EGFP expression in embryonic stem cells. *Int J Dev Biol*, **57**, 725-729.
23. Zhang, J., Ma, Z. and Kurgan, L. (2019) Comprehensive review and empirical analysis of hallmarks of DNA-, RNA- and protein-binding residues in protein chains. *Brief Bioinform*, **20**, 1250-1268.
24. Cheng, J., Randall, A.Z., Sweredoski, M.J. and Baldi, P. (2005) SCRATCH: a protein structure and structural feature prediction server. *Nucleic Acids Res*, **33**, W72-76.
25. Trott, O. and Olson, A.J. (2010) AutoDock Vina: improving the speed and accuracy of docking with a new scoring function, efficient optimization, and multithreading. *J Comput Chem*, **31**, 455-461.
26. Williamson, M.P. (2013) Using chemical shift perturbation to characterise ligand binding. *Prog Nucl Magn Reson Spectrosc*, **73**, 1-16.
27. Jayaram, B., McConnell, K., Dixit, S.B., Das, A. and Beveridge, D.L. (2002) Free-energy component analysis of 40 protein-DNA complexes: a consensus view on the thermodynamics of binding at the molecular level. *J Comput Chem*, **23**, 1-14.
28. Cokol, M., Nair, R. and Rost, B. (2000) Finding nuclear localization signals. *EMBO Rep*, **1**, 411-415.
29. Catimel, B., Teh, T., Fontes, M.R., Jennings, I.G., Jans, D.A., Howlett, G.J., Nice, E.C. and Kobe, B. (2001) Biophysical characterization of interactions involving importin- $\alpha$  during nuclear import. *J Biol Chem*, **276**, 34189-34198.
30. Kozakov, D., Li, K., Hall, D.R., Beglov, D., Zheng, J., Vakili, P., Schueler-Furman, O., Paschalidis, I.C.h., Clore, G.M. and Vajda, S. (2014) Encounter complexes and dimensionality reduction in protein-protein association. *Elife*, **3**, e01370.

31. Hannon, R., Richards, E.G. and Gould, H.J. (1986) Facilitated diffusion of a DNA binding protein on chromatin. *EMBO J*, **5**, 3313-3319.
32. Leven, I. and Levy, Y. (2019) Quantifying the two-state facilitated diffusion model of protein-DNA interactions. *Nucleic Acids Res*, **47**, 5530-5538.
33. Riggs, A.D., Bourgeois, S. and Cohn, M. (1970) The lac repressor-operator interaction. 3. Kinetic studies. *J Mol Biol*, **53**, 401-417.
34. rg, O.G., Winter, R.B. and von Hippel, P.H. (1981) Diffusion-driven mechanisms of protein translocation on nucleic acids. 1. Models and theory. *Biochemistry*, **20**, 6929-6948.
35. Halford, S.E. and Marko, J.F. (2004) How do site-specific DNA-binding proteins find their targets? *Nucleic Acids Res*, **32**, 3040-3052.
36. Sokolov, I.M., Metzler, R., Pant, K. and Williams, M.C. (2005) Target search of N sliding proteins on a DNA. *Biophys J*, **89**, 895-902.
37. Hu, T., Grosberg, A.Y. and Shklovskii, B.I. (2006) How proteins search for their specific sites on DNA: the role of DNA conformation. *Biophys J*, **90**, 2731-2744.
38. Wunderlich, Z. and Mirny, L.A. (2008) Spatial effects on the speed and reliability of protein-DNA search. *Nucleic Acids Res*, **36**, 3570-3578.
39. Halford, S.E. (2009) An end to 40 years of mistakes in DNA-protein association kinetics? *Biochem Soc Trans*, **37**, 343-348.
40. Kolomeisky, A.B. (2011) Physics of protein-DNA interactions: mechanisms of facilitated target search. *Phys Chem Chem Phys*, **13**, 2088-2095.
41. Bauer, M. and Metzler, R. (2012) Generalized facilitated diffusion model for DNA-binding proteins with search and recognition states. *Biophys J*, **102**, 2321-2330.
42. Brackley, C.A., Cates, M.E. and Marenduzzo, D. (2013) Intracellular facilitated diffusion: searchers, crowders, and blockers. *Phys Rev Lett*, **111**, 108101.
43. Normanno, D., Boudarène, L., Dugast-Darzacq, C., Chen, J., Richter, C., Proux, F., Bénichou, O., Voituriez, R., Darzacq, X. and Dahan, M. (2015) Probing the target search of DNA-binding proteins in mammalian cells using TetR as model searcher. *Nat Commun*, **6**, 7357.
44. Shvets, A.A., Kochugaeva, M.P. and Kolomeisky, A.B. (2018) Mechanisms of Protein Search for Targets on DNA: Theoretical Insights. *Molecules*, **23**.
45. Slutsky, M. and Mirny, L.A. (2004) Kinetics of protein-DNA interaction: facilitated target location in sequence-dependent potential. *Biophys J*, **87**, 4021-4035.
46. Yasuno, K., Yamazaki, T., Tanaka, Y., Kodama, T.S., Matsugami, A., Katahira, M., Ishihama, A. and Kyogoku, Y. (2001) Interaction of the C-terminal domain of the E. coli RNA polymerase alpha subunit with the UP element: recognizing the backbone structure in the minor groove surface. *J Mol Biol*, **306**, 213-225.

47. Vuzman, D. and Levy, Y. (2012) Intrinsically disordered regions as affinity tuners in protein-DNA interactions. *Mol Biosyst*, **8**, 47-57.
48. Lee, S.J., Matsuura, Y., Liu, S.M. and Stewart, M. (2005) Structural basis for nuclear import complex dissociation by RanGTP. *Nature*, **435**, 693-696.
49. Tsujii, A., Y. Miyamoto, T. Moriyama, Y. Tsuchiya, C. Obuse, K. Mizuguchi, M. Oka and Y. Yoneda (2015). Retinoblastoma-binding Protein 4-regulated Classical Nuclear Transport Is Involved in Cellular Senescence. *J Biol Chem* 290(49): 29375-29388.
50. Herold, A., Truant, R., Wiegand, H. and Cullen, B.R. (1998) Determination of the functional domain organization of the importin alpha nuclear import factor. *J Cell Biol*, **143**, 309-318.
51. Sun, C., Fu, G., Ciziene, D., Stewart, M. and Musser, S.M. (2013) Choreography of importin- $\alpha$ /CAS complex assembly and disassembly at nuclear pores. *Proc Natl Acad Sci U S A*, **110**, E1584-1593.
52. Matsuura, Y. and Stewart, M. (2004) Structural basis for the assembly of a nuclear export complex. *Nature*, **432**, 872-877.
53. Cingolani, G., Petosa, C., Weis, K. and Müller, C.W. (1999) Structure of importin-beta bound to the IBB domain of importin-alpha. *Nature*, **399**, 221-229.
54. Ogawa, Y. and Imamoto, N. (2018) Nuclear transport adapts to varying heat stress in a multistep mechanism. *J Cell Biol*, **217**, 2341-2352.
55. Kose, S., Furuta, M. and Imamoto, N. (2012) Hikeshi, a nuclear import carrier for Hsp70s, protects cells from heat shock-induced nuclear damage. *Cell*, **149**, 578-589.
56. Young, J.C., Major, A.T., Miyamoto, Y., Loveland, K.L. and Jans, D.A. (2011) Distinct effects of importin  $\alpha 2$  and  $\alpha 4$  on Oct3/4 localization and expression in mouse embryonic stem cells. *FASEB J*, **25**, 3958-3965.
57. Yasuhara, N., Shibazaki, N., Tanaka, S., Nagai, M., Kamikawa, Y., Oe, S., Asally, M., Kamachi, Y., Kondoh, H. and Yoneda, Y. (2007) Triggering neural differentiation of ES cells by subtype switching of importin-alpha. *Nat Cell Biol*, **9**, 72-79.
58. Li, X., Sun, L. and Jin, Y. (2008) Identification of karyopherin-alpha 2 as an Oct4 associated protein. *J Genet Genomics*, **35**, 723-728.
59. Yasuhara, N., Yamagishi, R., Arai, Y., Mehmood, R., Kimoto, C., Fujita, T., Touma, K., Kaneko, A., Kamikawa, Y., Moriyama, T. *et al.* (2013) Importin alpha subtypes determine differential transcription factor localization in embryonic stem cells maintenance. *Dev Cell*, **26**, 123-135.
60. Huang, S.M., Huang, S.P., Wang, S.L. and Liu, P.Y. (2007) Importin alpha1 is involved in the nuclear localization of Zac1 and the induction of p21WAF1/CIP1 by Zac1. *Biochem J*, **402**, 359-366.



61. Chan, C.K. and Jans, D.A. (1999) Synergy of importin alpha recognition and DNA binding by the yeast transcriptional activator GAL4. *FEBS Lett*, **462**, 221-224.
62. Moriyama, T., Sangel, P., Yamaguchi, H., Obuse, C., Miyamoto, Y., Oka, M. and Yoneda, Y. (2015) Identification and characterization of a nuclear localization signal of TRIM28 that overlaps with the HP1 box. *Biochem Biophys Res Commun*, **462**, 201-207.
63. Klocko, A.D., Rountree, M.R., Grisafi, P.L., Hays, S.M., Adhvaryu, K.K. and Selker, E.U. (2015) Neurospora importin  $\alpha$  is required for normal heterochromatic formation and DNA methylation. *PLoS Genet*, **11**, e1005083.
64. Galazka, J.M., Klocko, A.D., Uesaka, M., Honda, S., Selker, E.U. and Freitag, M. (2016) Neurospora chromosomes are organized by blocks of importin alpha-dependent heterochromatin that are largely independent of H3K9me3. *Genome Res*, **26**, 1069-1080.
65. Brownlee, C. and Heald, R. (2019) Importin  $\alpha$  Partitioning to the Plasma Membrane Regulates Intracellular Scaling. *Cell*, **176**, 805-815.e808.
66. Palikyras, S. and Papantonis, A. (2019) Modes of phase separation affecting chromatin regulation. *Open Biol*, **9**, 190167.
67. Mackmull, M.T., Klaus, B., Heinze, I., Chokkalingam, M., Beyer, A., Russell, R.B., Ori, A. and Beck, M. (2017) Landscape of nuclear transport receptor cargo specificity. *Mol Syst Biol*, **13**, 962.
68. Fosgerau, K. and Hoffmann, T. (2015) Peptide therapeutics: current status and future directions. *Drug Discov Today*, **20**, 122-128.
69. Miyamoto, Y., Boag, P.R., Hime, G.R. and Loveland, K.L. (2012) Regulated nucleocytoplasmic transport during gametogenesis. *Biochim Biophys Acta*, **1819**, 616-630.
70. Loveland, K.L., Major, A.T., Butler, R., Young, J.C., Jans, D.A. and Miyamoto, Y. (2015) Putting things in place for fertilization: discovering roles for importin proteins in cell fate and spermatogenesis. *Asian J Androl*, **17**, 537-544.
71. Yasuhara, N. and Yoneda, Y. (2017) Importins in the maintenance and lineage commitment of ES cells. *Neurochem Int*, **105**, 32-41.

## Figure Legends

### Figure 1

Importin  $\alpha 2$  localises in the nucleus and binds the genomic DNA, including the upstream region of the POU5F1 gene, with affinity for diverse sequences in undifferentiated mouse ES cells. (A) Endogenous importin  $\alpha 2$  localisation was shown by immunofluorescence in undifferentiated ES cells using two different antibodies. Upper panel: goat polyclonal antibody, lower panel: rat monoclonal antibody, green: importin  $\alpha 2$ , blue: DNA. (B) Sheared genomic DNA of approximately 600 bp was purified from undifferentiated mouse ES cells and used for gel electrophoresis with



recombinant importin  $\alpha 2$  protein. The black triangle shows the two concentrations of importin  $\alpha 2$  added to the binding reaction, 17.24 or 34.48 pmol. (C, D) ChIP-qPCR analysis with a specific antibody for importin  $\alpha 2$  or the non-specific control IgG were performed to confirm the binding of importin  $\alpha 2$  to the POU5F1 gene. (C) The primer sets used in the experiments are shown. (D) Results of ChIP-qPCR for the POU5F1 primers upstream-1 and upstream -2. The measured quantity of the importin  $\alpha 2$  IP sample against a ChIP control sample is listed in terms of mean values of relative ratio with error bars (SE) in four independent experiments. Relative ratios were calculated and shown as importin  $\alpha 2$  ChIP/ChIP control (shaded bar), ChIP control/ChIP control (=1, closed bar). See also Supplementary Figure S1.

### Figure 2

Importin  $\alpha 2$  bound DNA *in vitro* via the IBB domain. (A) Full-length and deleted-recombinant importin  $\alpha 2$  used in gel-shift (*in vitro* binding) assays. (B-C) The genomic DNA sequence from the importin  $\alpha 2$ -bound region in Oct3/4, determined by the ChIP-qPCR analysis in Figure 1C and D, was selected and applied to these *in vitro* binding assays. DNA sequences from the Oct3/4 upstream region (upstream-1 and -2) were located as described in Figure 1C. Naked DNAs of upstream-1 (B) and upstream-2 (C) were used. The black triangle shows the two concentrations of importin  $\alpha 2$  added, 17.24 or 34.48 pmol. (D) Conservation of basic amino acid sites of the importin  $\alpha$  IBB domains. Amino acid sequences of mouse importin  $\alpha$  (KPNA) families were aligned using ClustalW (DDBJ). The basic amino acid clusters without gaps and a cluster with gaps are presented in blue boxes. (E) A graphical representation of the amino acid conservation (Sequence logo) of IBB domains created with WebLogo (see Supplementary Methods 7.1.2. for detailed procedure). The height of each letter within the stack indicates the relative frequency of each amino acid at that position. See also Supplementary Figure S2.

### Figure 3

Importin  $\alpha 2$  bound DNA via basic amino acids of the helical structure in the IBB domain. (A) The basic amino acid clusters in the IBB domain of importin  $\alpha 2$  were mutated as indicated. The helical portion explained in (D) is indicated in box no. 1 and 2. (B-D) Recombinant wild-type and mutant importin  $\alpha$  proteins were applied to *in vitro* binding assays using naked DNAs for upstream-1 (B) and upstream-2 (C) regions of the Oct 3/4 gene, and sheared genomic DNA of approximately 600 bp was purified from undifferentiated mouse ES cells (D). The black triangle shows the two concentrations of importin  $\alpha 2$  added to the binding reaction, 17.24 or 34.48 pmol. (E) The location of the basic clusters indicated on the helix structures obtained by the Swiss Model with the template of IBB in the complex with importin  $\beta 1$  (PDB ID: 1QGK), where the basic amino acids are coloured blue and the acidic amino acids are coloured red. The box nos. 1 and 2 correspond to those presented

in (A). (F) The amino acid sequence was analysed to predict the structural features through the web server SCRATCH. (G) CD spectroscopy to predict the helix content in IBB (mouse importin  $\alpha_2$ \_1-69 peptide) in the absence and presence of dsDNA (upstream-1 600 bp). a) 6.6  $\mu\text{M}$  of peptide only, b) 6.6  $\mu\text{M}$  of DNA, c) mixture of the peptide and DNA, d) difference spectrum obtained by subtracting b) from c). (H) The predicted secondary structure contents for the peptide in the absence and presence of DNA. The upper panel shows the structures in the absence of the DNA and the lower shows the structures in the presence of the DNA. The unit of vertical axis is ellipticity described in mdeg. See also Supplementary Figure S3, 4.

#### Figure 4

Importin  $\alpha_2$  bound DNA in multi-mode. (A-D) Two model structures of the importin  $\alpha_2$  IBB domain/DNA complex were obtained from molecular docking and MD simulation: mode A (A and C) and mode B (B and D). DNA is shown in the surface model and coloured according to atoms (carbon: grey, oxygen: red, nitrogen: blue, phosphorus: yellow) (A-D). The  $\alpha$ -helices of importin  $\alpha$  are shown in a ribbon model (A and B) or a surface model (C and D) and are coloured green. Three positively charged patches in the  $\alpha$ -helix, 28RRRR, 39RKAKK, and 49KRR, are shown in sticks coloured in magenta, cyan, and orange, respectively. N-terminal basic residues that formed short helices (13R, 16R, 18K, 20K, and 22K) are also shown as sticks and coloured in yellow. (E, F)  $^1\text{H}$ - $^1\text{D}$  NMR titration experiments. The spectral changes in the imino proton region of the DNA induced by addition of indicated concentrations of peptide, importin  $\alpha_2$ \_21-50, the core part of the arginine-rich region in mouse importin  $\alpha_2$ , are shown. (E) The spectral change for 50  $\mu\text{M}$  of the 15-bp double-stranded DNA of the SOX-POU binding region upstream of POU5F1. (F) The change with 50  $\mu\text{M}$  of a 15-bp double-stranded randomised sequence DNA. The peptide concentrations are indicated in each Figure. Spectral perturbations observed in the titration experiments. A representative perturbation profile for the NMR spectra of (G) SOX-POU DNA by mouse importin  $\alpha_2$ \_21-50 peptide (peak9), and (H) random-sequence DNA by mouse importin  $\alpha_2$ \_21-50 peptide (peak9). Peaks are reconstituted with parameters obtained from the decomposition. (G-a) 50  $\mu\text{M}$  of SOX-POU core sequence DNA in the absence of the peptide, (G-b) DNA with 50  $\mu\text{M}$  of mouse importin  $\alpha_2$ \_21-50 peptide, (G-c) DNA with 100  $\mu\text{M}$  of the peptide, (G-d) DNA with 150  $\mu\text{M}$  of the peptide, (G-e) DNA with 200  $\mu\text{M}$  of the peptide, (G-f) DNA with 250  $\mu\text{M}$  of the peptide, (H-a) 50  $\mu\text{M}$  of random-sequence DNA in the absence of the peptide, (H-b) DNA with 50  $\mu\text{M}$  of the peptide, (H-c) DNA with 100  $\mu\text{M}$  of the peptide, (H-d) DNA with 150  $\mu\text{M}$  of the peptide, (H-e) DNA with 200  $\mu\text{M}$  of the peptide, and (H-f) DNA with 250  $\mu\text{M}$  of the peptide. See also Supplementary Figures S5, 7.

#### Figure 5

Importin  $\alpha$  proteins multiply bound genomic DNA of ES cells. Sheared genomic DNA of approximately 600 bp purified from undifferentiated mouse ES cells was applied to gel electrophoresis with recombinant proteins of importin  $\alpha 2$ ,  $\alpha 1$ , and  $\alpha 3$ , as indicated. The black triangle shows the two concentrations of importin  $\alpha 2$  added to the binding reaction, 17.24 or 34.48 pmol. See also Supplementary Figure S8.

### Figure 6

The importin  $\alpha$ -DNA association model. (A) The schematic chart shows the NAAT domain of importin  $\alpha 2$ . The NAAT domain (13R-51R, blue box) localises within the IBB domain (dotted box) and contains basic amino acid clusters (shaded in blue), including the tetra-R motif (28RRRR) that predominantly binds DNA, which are indicated on the helix structures obtained by the Swiss Model with template of IBB in a complex with importin  $\beta 1$  (PDB ID: 1QGK) (11A-54S) adding the missing parts at both ends (1M-12A, and 52N-69N, dotted line), where the basic amino acids are coloured blue and the acidic amino acids are coloured red. (B) When importin  $\alpha 2$  approaches chromatin (with or without cargo or interacting proteins), the Nucleic Acid Associating Trolley pole domain (NAAT domain, R13-K51 of mouse importin  $\alpha 2$ ) in the helix structure within the IBB domain associates with DNA predominantly with a tetra-R motif. Importin  $\alpha 2$  associates with DNA and strolls around by transitions among multiple modes, showing sliding, hopping, and jumping to neighbouring DNA. See also Supplementary Figure S10 for regulation of cargo fate determination.

### Tables

**Table 1. Calculated binding free energies ( $\Delta G_{\text{bind}}$ ) between IBB domain and DNA in the MD simulations**

| $\Delta G_{\text{bind}}$ (kJ/mol) | Mode A <sup>a</sup> | Mode B <sup>b</sup> |
|-----------------------------------|---------------------|---------------------|
| Wild type                         | -526.05 $\pm$ 36.28 | -602.96 $\pm$ 27.91 |
| 28A4                              | -296.06 $\pm$ 40.04 | -431.71 $\pm$ 20.42 |
| 39A5                              | -342.54 $\pm$ 10.21 | -426.85 $\pm$ 15.31 |
| 49A3                              | -432.00 $\pm$ 21.46 | -508.82 $\pm$ 19.56 |

<sup>a</sup> Values for wild type was averaged over a 7 ns period ranging from 11 to 18 ns, those for variants were averaged over last 2 ns (8 ~ 10 ns).

<sup>b</sup> Values for wild type was averaged over a 5 ns period ranging from 25 to 30 ns, those for variants were averaged over last 2 ns (8 ~ 10 ns).

Figure 1

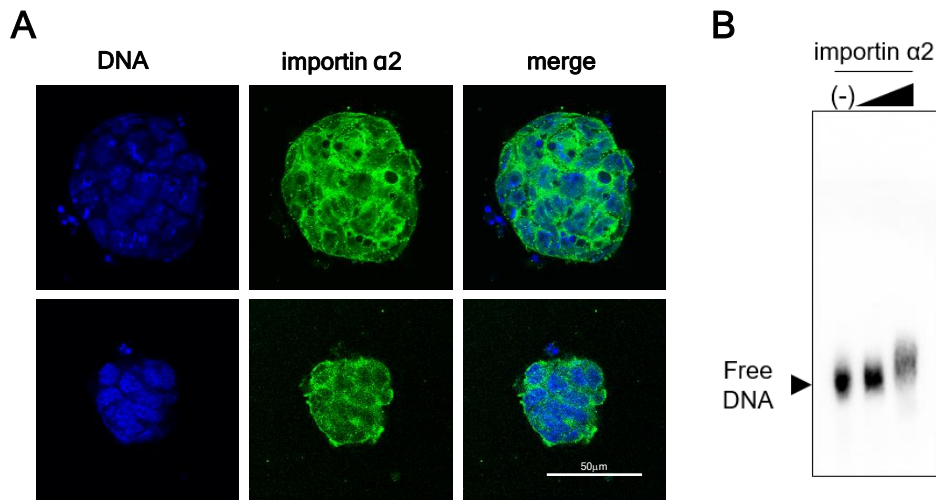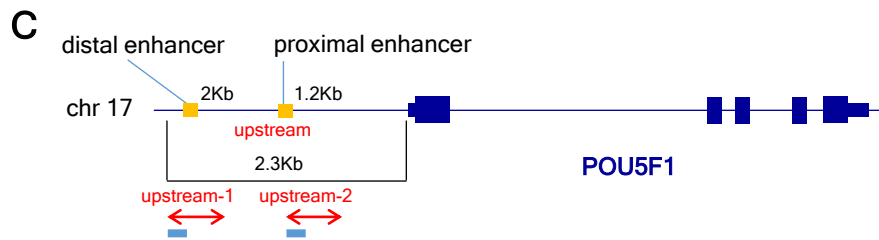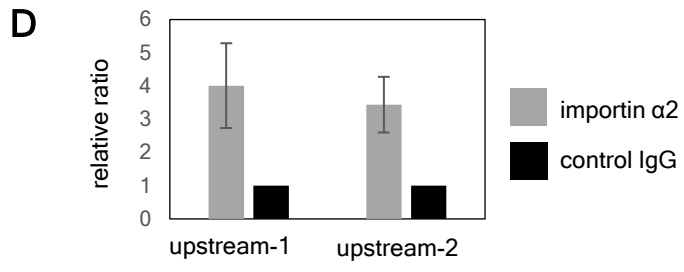

Figure 2

A

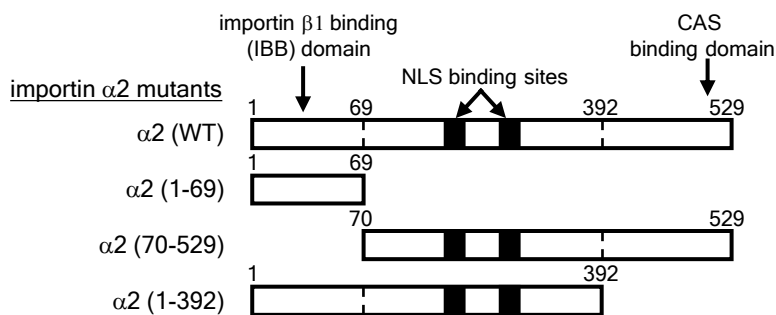

B

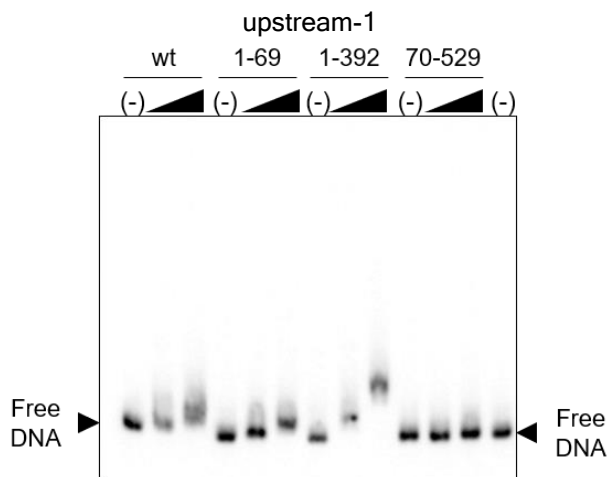

C

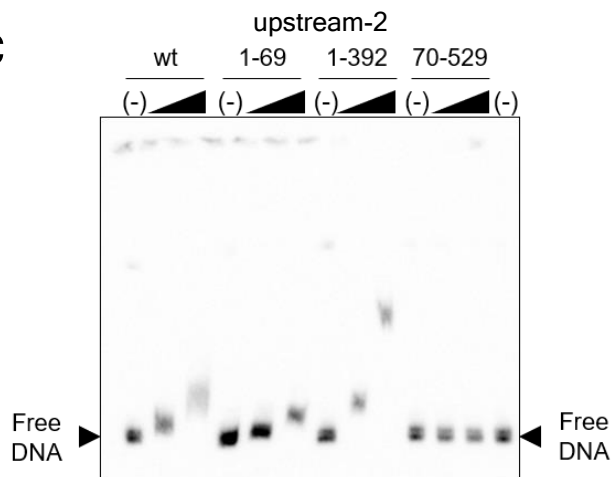

D

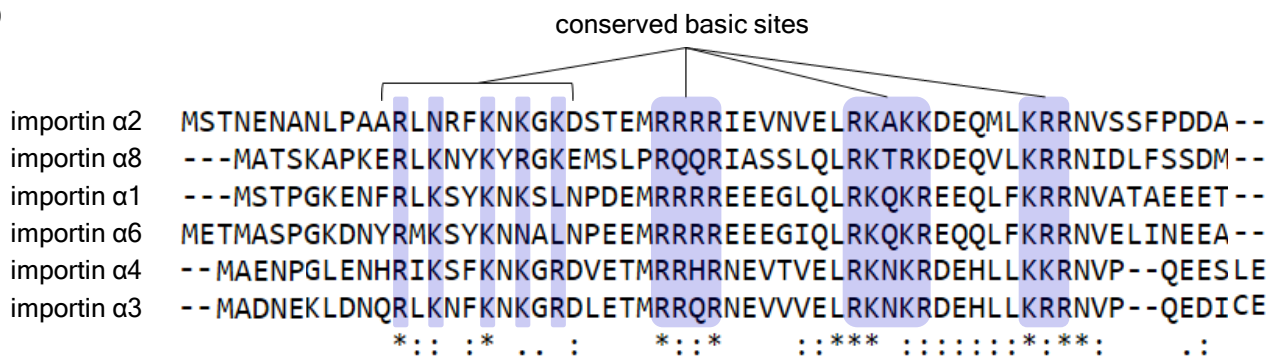

E

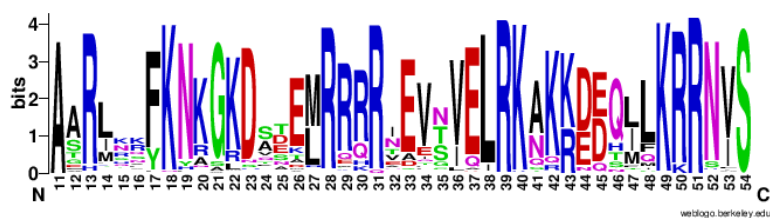



Figure 4

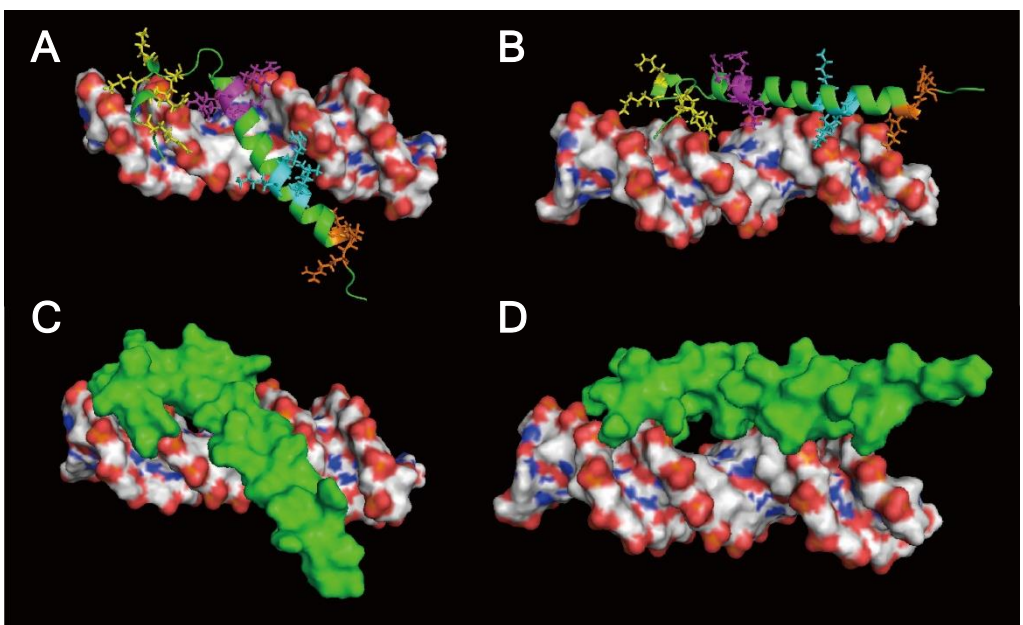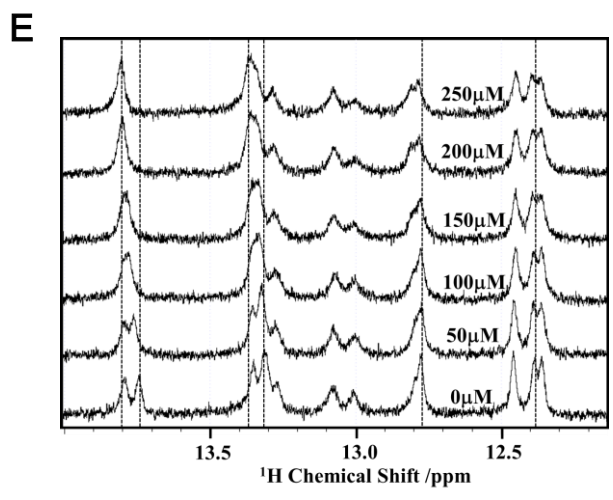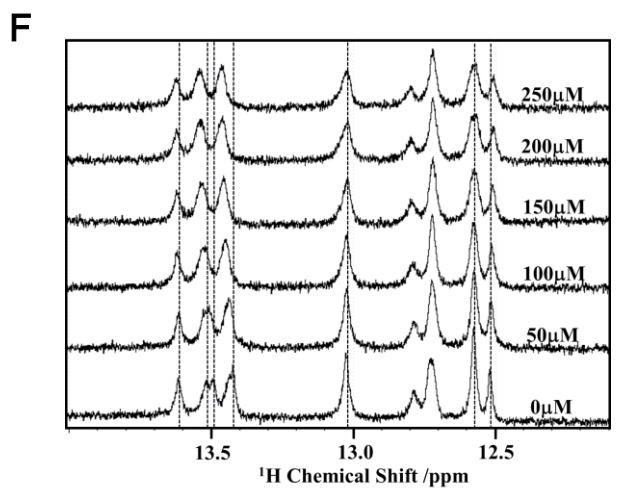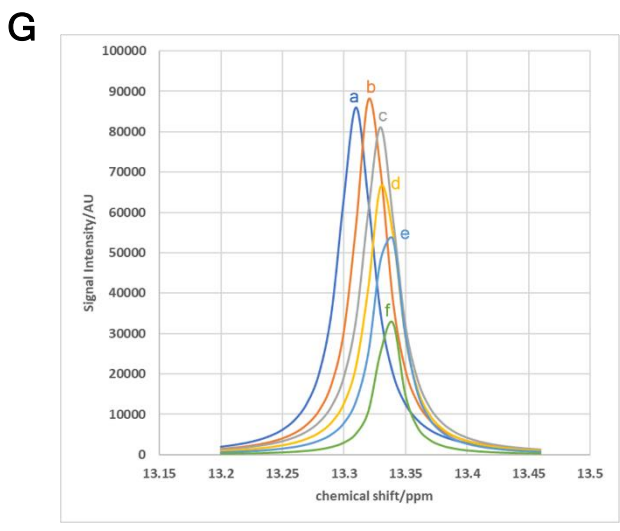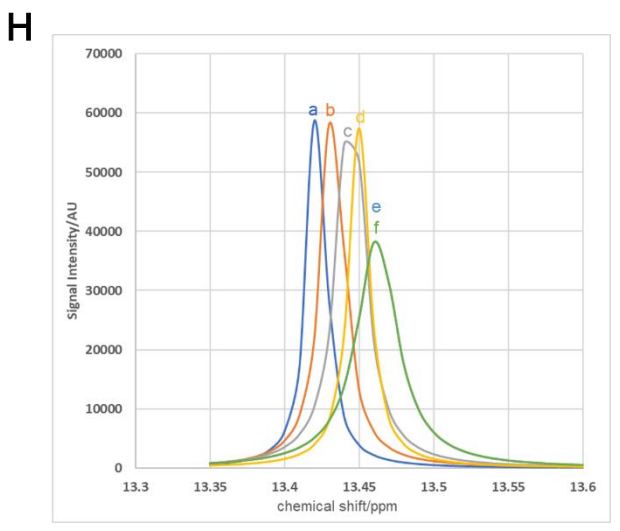

Figure 5

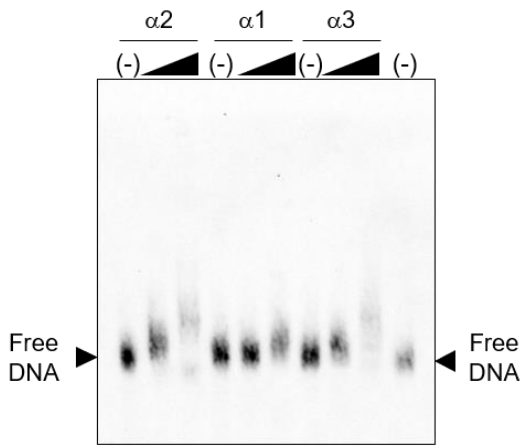



Figure 6

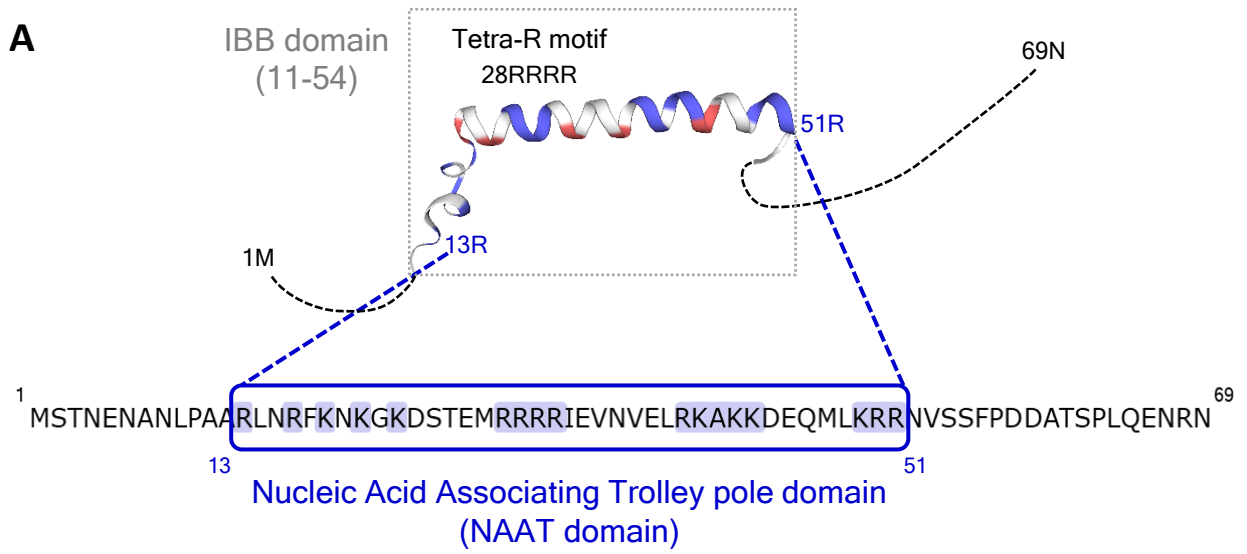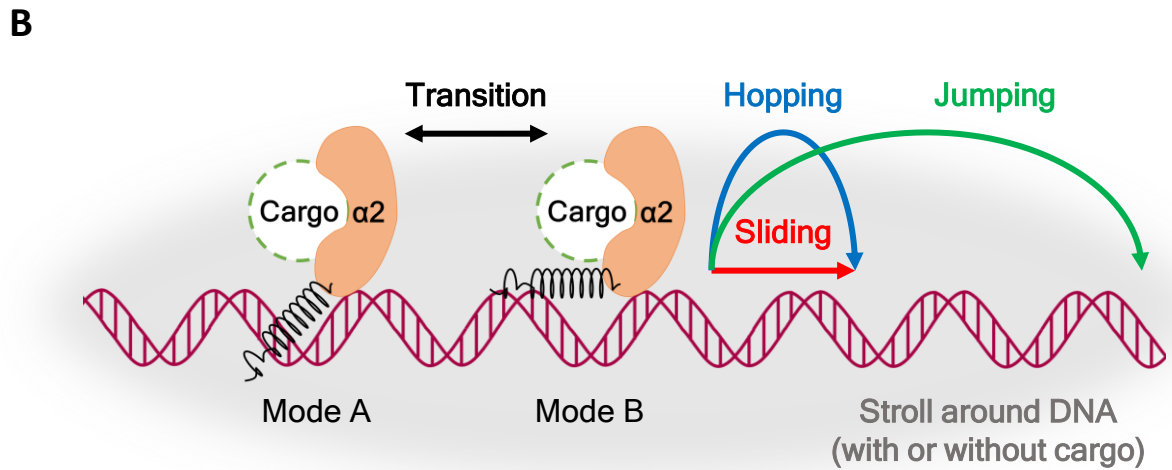

Source: https://www.biorxiv.org/content/10.1101/2020.05.04.075580v4.full.pdf
